# Supplementary material for: Abo1, a conserved bromodomain AAA‐ATPase, maintains global nucleosome occupancy and organisation
Source: PubMed Central journal article supplement (PMC4718406; doi:10.15252/embr.201540476), 2015-11-18
Supplement: EMBR-17-079-s001.pdf [file EMBR-17-079-s001.pdf]

## APPENDIX ITEMS

### Table of Contents

| Page(s) | Item                                                                                                                                                         |
|---------|--------------------------------------------------------------------------------------------------------------------------------------------------------------|
| 2       | <b>Appendix Figure S1.</b> <i>k</i> -means clustering of nucleosome position frequency values for <i>S. pombe</i> protein coding genes (High MNase dataset). |
| 3       | <b>Appendix Figure S2.</b> Abo1 does not influence the expression of heterochromatin genes.                                                                  |
| 4       | <b>Appendix Figure S3.</b> Phenotypic analysis of <i>abo1-Pk</i> and <i>abo1-GFP</i> strains                                                                 |
| 5-7     | <b>Appendix Table S1.</b> Strains used in this study.                                                                                                        |

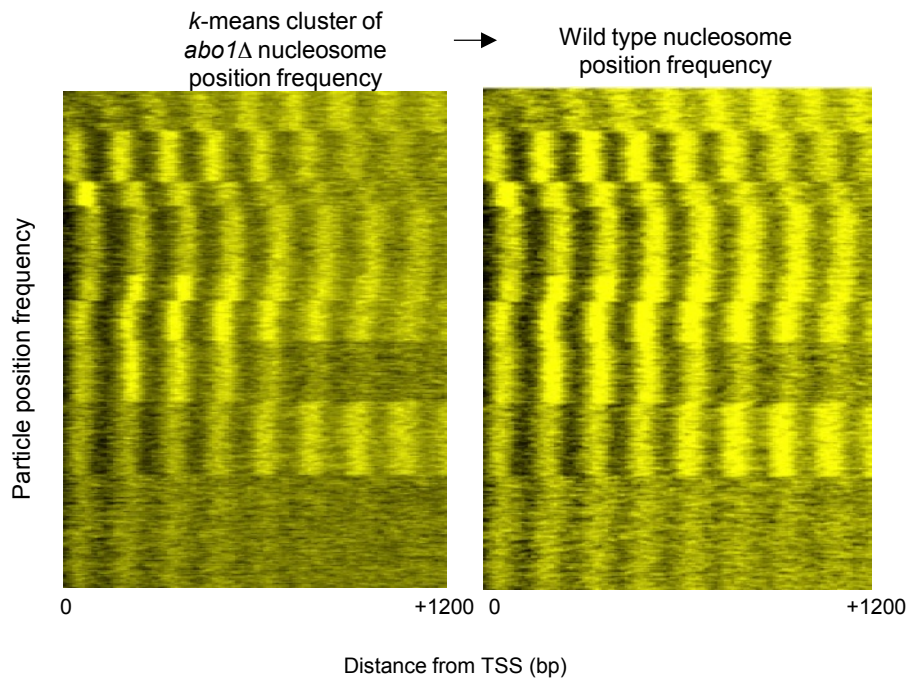

**Appendix Figure S1.** Nucleosome position frequency values for the coding regions of 4013 *S. pombe* genes were *k*-means clustered ( $k = 9$ ) using the *abo1Δ* data from the high MNase digestion data set and displayed with positive values coloured yellow and other values coloured black (left-hand panel). The cluster order was then used to display the equivalent wild type frequency values (right-hand panel). As observed in Figure 2B, all clustered peak profiles identified in the *abo1Δ* mutant resolved more clearly with the wild type dataset. Note that the order of the clusters displayed here is different to those defined for the low MNase dataset in Figure 2B.

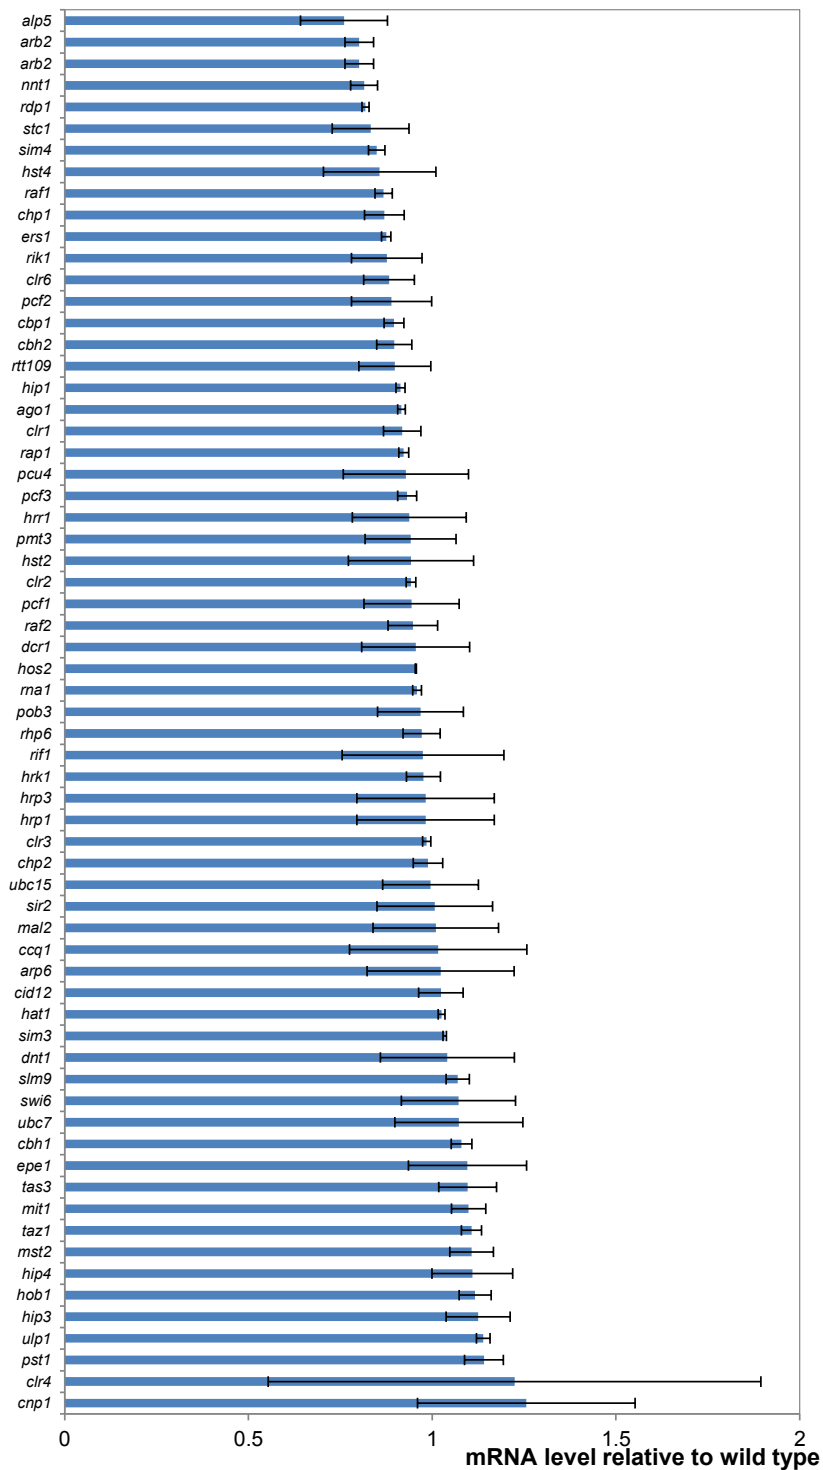

**Appendix Figure S2. Abo1 does not influence the expression of heterochromatin genes.**

The impact of *abo1*<sup>+</sup> deletion on the mRNA level of 65 genes whose products contribute to heterochromatin was determined by microarray analysis. RNA level is shown relative to wild type. Means were calculated from duplicate experiments. Error bars indicate the range of the data.

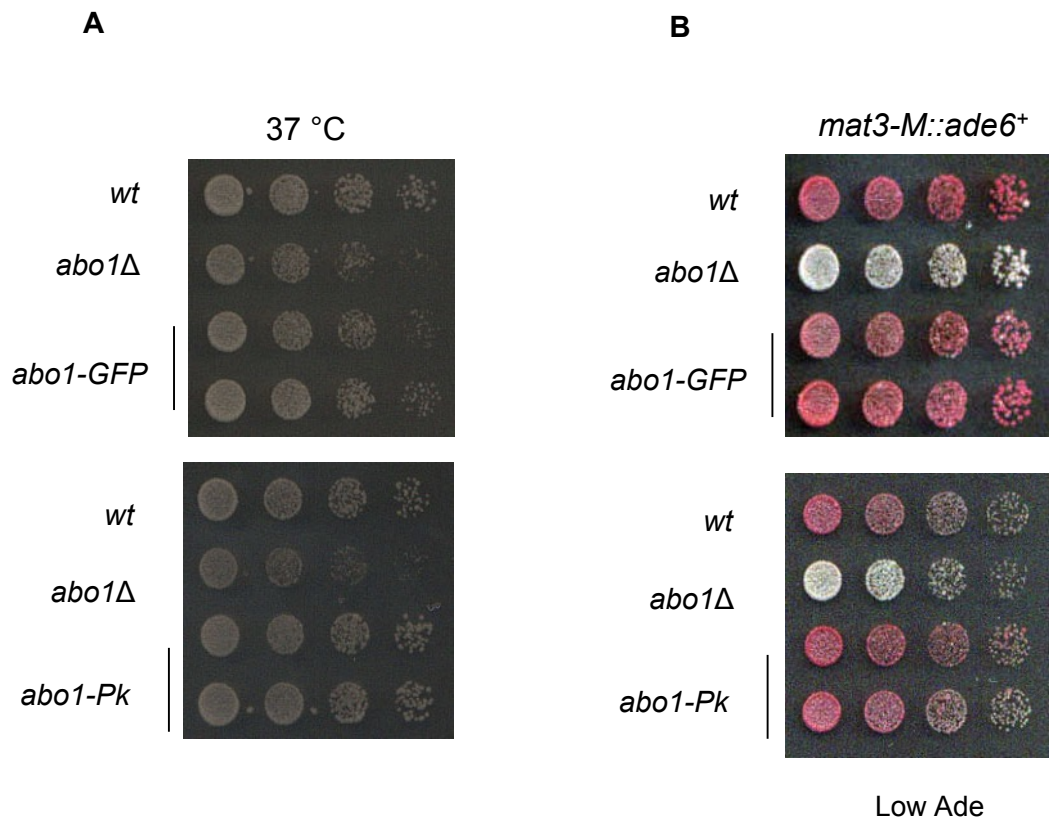

**Appendix Figure S3. Phenotypic analysis of *abo1-Pk* and *abo1-GFP* strains.**

**A.** The indicated strains were grown to mid log phase, subjected to five-fold serial dilution and spotted onto YES5 plates and incubated at 37°C for 2 days. **B.** As for A, except cells were spotted on YE5S plates lacking adenine and incubated at 30°C for 3-4 days. Data is representative of two biological repeats.

**Appendix Table S1. Strains used in this study.**

| Strain | Genotype                                                                                            | Ref / Source |
|--------|-----------------------------------------------------------------------------------------------------|--------------|
| NT5    | <i>h<sup>-</sup> ade6-216 leu1-32 ura4-D18</i>                                                      | Lab stock    |
| SW759  | <i>h<sup>+</sup> ade6-216 leu1-32 ura4-D18 abo1::kanMX</i>                                          | [1]          |
| SW760  | <i>h<sup>+</sup> ade6-216 leu1-32 ura4-D18 abo2::kanMX</i>                                          | [1]          |
| SW232  | <i>h<sup>+</sup> ade6-210 leu1-32 ura4-DS/E imr1R(NcoI)::ura4<sup>+</sup></i>                       | [2]          |
| SW873  | <i>h<sup>+</sup> ade6-210 leu1-32 ura4- imr1R(NcoI)::ura4<sup>+</sup> abo1::kanMX</i>               | This study   |
| SW874  | <i>h<sup>+</sup> ade6-210 leu1-32 ura4- imr1R(NcoI)::ura4<sup>+</sup> abo1::kanMX</i>               | This study   |
| SW875  | <i>h<sup>+</sup> ade6-210 leu1-32 ura4- imr1R(NcoI)::ura4<sup>+</sup> abo2::kanMX</i>               | This study   |
| SW876  | <i>h<sup>+</sup> ade6-210 leu1-32 ura4- imr1R(NcoI)::ura4<sup>+</sup> abo2::kanMX</i>               | This study   |
| FY4811 | <i>h<sup>+</sup> ade6-210 leu1-32 ura4-DS/E otr1R(SphI)::ura4<sup>+</sup></i>                       | [2]          |
| SW844  | <i>h<sup>+</sup> ade6-210 leu1-32 ura4-DS/E otr1R(SphI)::ura4<sup>+</sup> abo1::kanMX</i>           | This study   |
| SW845  | <i>h<sup>+</sup> ade6-210 leu1-32 ura4-DS/E otr1R(SphI)::ura4<sup>+</sup> abo1::kanMX</i>           | This study   |
| SW846  | <i>h<sup>-</sup> ade6-210 leu1-32 ura4-DS/E otr1R(SphI)::ura4<sup>+</sup> abo2::kanMX</i>           | This study   |
| SW847  | <i>h<sup>+</sup> ade6-210 leu1-32 ura4-DS/E otr1R(SphI)::ura4<sup>+</sup> abo2::kanMX</i>           | This study   |
| PG1672 | <i>mat1-P<math>\Delta</math>17::LEU2 mat3-M(EcoRV)::ade6 ade6-M210 leu1-32 ura4-D18</i>             | [3]          |
| SW840  | <i>mat1-P<math>\Delta</math>17::LEU2 mat3-M(EcoRV)::ade6 ade6-M210 leu1-32 ura4-D18 abo1::kanMX</i> | This study   |
| SW841  | <i>mat1-P<math>\Delta</math>17::LEU2 mat3-M(EcoRV)::ade6 ade6-M210 leu1-32 ura4-D18 abo1::kanMX</i> | This study   |
| SW842  | <i>mat1-P<math>\Delta</math>17::LEU2 mat3-M(EcoRV)::ade6 ade6-M210 leu1-32 ura4-D18 abo2::kanMX</i> | This study   |
| SW843  | <i>mat1-P<math>\Delta</math>17::LEU2 mat3-M(EcoRV)::ade6 ade6-M210 leu1-32 ura4-D18 abo2::kanMX</i> | This study   |
| 972    | <i>h<sup>-</sup></i>                                                                                | Lab stock    |
| HM463  | <i>h<sup>-</sup> abo1::kanMX</i>                                                                    | This study   |
| HM466  | <i>h<sup>-</sup> abo2::kanMX</i>                                                                    | This study   |
| PY1798 | <i>h<sup>-</sup> ade6-210 leu1-32 ura4-DS/E arg3-D4 his3-D1 clr4::kanMX</i>                         | [4]          |
| A8890  | <i>h<sup>+</sup> ade6-210 leu1-32 ura4-D18 arg3-D4 his3-D1 abo1-GFP(kanMX)</i>                      | This study   |
| SW865  | <i>h<sup>-</sup> ade6-M216 leu1-32 ura4-D18 abo1-PK(ura4<sup>+</sup>)</i>                           | This study   |
| A5259  | <i>h<sup>-</sup> spt16-18(kanMX) leu1-32</i>                                                        | [5]          |
| EL238  | <i>h<sup>-</sup> ade6-210 leu1-32 ura4-DS/E arg3-D4 his3-D1 pob3::natMX</i>                         | [6]          |
| EL313  | <i>h<sup>+</sup> ade6-M210 arg3-D4 his3-D1 leu1-32 ura4-DS/E spt16-L-GFP(kanMX)</i>                 | [6]          |

|        |                                                                                                                                            |            |
|--------|--------------------------------------------------------------------------------------------------------------------------------------------|------------|
| EL130  | <i>h<sup>-</sup> otr1R(Sph1)::ura4<sup>+</sup> arg3-D4 his3-D1 leu1-32 ura4-DS/E pob3-L-GFP(kanMX)</i>                                     | [6]        |
| CsG338 | <i>h<sup>+</sup> ade6-216 ura4-D18 leu1-32 his3-D1 spt16-L-GFP(kanMX) abo1-PK(ura4<sup>+</sup>)</i>                                        | This study |
| CsG351 | <i>h<sup>+/-</sup> ade6-210 otr1R(Sph1)::ura4<sup>+</sup> arg3-D4 leu1-32 ura4<sup>-</sup> pob3-L-GFP(kanMX) abo1-PK(ura4<sup>+</sup>)</i> | This study |
| CsG352 | <i>h<sup>+/-</sup> ade6-210 leu1-32 ura4-D18 arg3-D4 abo1-GFP(kanMX) pob3::natMX</i>                                                       | This study |
| CsG360 | <i>h<sup>+/-</sup> leu1-32 ura4<sup>-</sup>D18 arg3-D4 abo1-GFP(kanMX) spt16-18(kanMX)</i>                                                 | This study |
| CsG345 | <i>h<sup>-</sup> ade6-210 leu1-32 ura4-D18 / DS/E his3-D1 arg3-D3 spt16-L-GFP(kanMX) abo1::kanMX</i>                                       | This study |
| CsG346 | <i>h<sup>-</sup> leu1-32 ura4-D18 / DS/E his3-D1 arg3-D3 pob3-L-GFP(kanMX) abo1::kanMX</i>                                                 | This study |
| CsG363 | <i>h<sup>+/-</sup> ade6-210 leu1-32 ura4-D18 abo1-GFP(kanMX) swi6::kanMX</i>                                                               | This study |
| HM136  | <i>h<sup>-</sup> ade6-216 leu1-32 ura4-D18 Tf2-6::lacZ(ura4<sup>+</sup>)</i>                                                               | [7]        |
| HM361  | <i>h<sup>-</sup> ade6-216 leu1-32 ura4-D18 Tf2-6::lacZ(ura4<sup>+</sup>) abo1::kanMX</i>                                                   | This study |
| HM353  | <i>h<sup>-</sup> ade6-216 leu1-32 ura4-D18 Tf2-6::lacZ(ura4<sup>+</sup>) abo2::kanMX</i>                                                   | This study |
| HM60   | <i>h<sup>-</sup> ade6-216 leu1-32 ura4-D18 chrmlI::Tf1-lacZ(ura4<sup>+</sup>)</i>                                                          | This study |
| HM362  | <i>h<sup>-</sup> ade6<sup>-</sup> leu1-32 ura4-D18 chrmlI::Tf1-lacZ(ura4<sup>+</sup>) abo1::kanMX</i>                                      | This study |
| HM372  | <i>h<sup>-</sup> ade6<sup>-</sup> leu1-32 ura4-D18 chrmlI::Tf1-lacZ(ura4<sup>+</sup>) abo2::kanMX</i>                                      | This study |
| SW700  | <i>h<sup>-</sup> ade6-210 leu1-32 ura4-D18 hip1::ura4<sup>+</sup></i>                                                                      | [8]        |
| SW877  | <i>h<sup>-</sup> ade6-210 leu1-32 ura4-D18 Ch16 R-23</i>                                                                                   | [8]        |
| SW881  | <i>h<sup>-</sup> ade6-210 leu1-32 ura4-D18 abo1::kanMX Ch16 R23</i>                                                                        | This study |
| SW882  | <i>h<sup>-</sup> ade6-210 leu1-32 ura4-D18 abo2::kanMX Ch16 R23</i>                                                                        | This study |
| SW886  | <i>h<sup>90</sup> ade6-210 leu1-32 ura4-D18</i>                                                                                            | Lab stock  |
| SW889  | <i>h<sup>90</sup> ade6-210 leu1-32 ura4-D18 abo1::kanMX</i>                                                                                | This study |
| SW887  | <i>h<sup>90</sup> ade6-210 leu1-32 ura4-D18 abo2::kanMX</i>                                                                                | This study |
| SW890  | <i>h<sup>-</sup> ade6-216 leu1-32 ura4- otr1R(SphI)::ura4<sup>+</sup> ars1(Mlul)::pRep81XGFPSwi6(LEU2) abo1::kanMX</i>                     | This study |
| PY6627 | <i>h<sup>-</sup> ade6-216 leu1-32 ura4- otr1R(SphI)::ura4<sup>+</sup> ars1(Mlul)::pRep81XGFPSwi6(LEU2)</i>                                 | This study |
| PY6629 | <i>h<sup>-</sup> ade6-216 leu1-32 ura4- otr1R(SphI)::ura4<sup>+</sup> ars1(Mlul)::pRep81XGFPSwi6(LEU2) clr4::kanMX</i>                     | This study |
| AW006  | <i>h<sup>+</sup> ade6-216 leu1-32 ura4-D18 abo1::natMX</i>                                                                                 | This study |
| AW057  | <i>h<sup>+/-</sup> ade6<sup>-</sup> leu1-32 ura4-D18 abo1::natMX pob3::kanMX</i>                                                           | This study |
| AW058  | <i>h<sup>+</sup> ade6-216 leu1-32 ura4-D18 nhp6::kanMX</i>                                                                                 | [1]        |

|       |                                                                                  |            |
|-------|----------------------------------------------------------------------------------|------------|
| AW039 | <i>h<sup>+/+</sup> ade6<sup>-</sup> leu1-32 ura4-D18 abo1::natMX nhp6::kanMX</i> | This study |
| AW056 | <i>h<sup>+</sup> ade6-216 leu1-32 ura4-D18 pob3::kanMX</i>                       | [1]        |

## References

1. Kim DU et al (2010) *Nature biotechnology*. **28**: 617-623.
2. Allshire RC et al (1995) *Genes Dev.* **9**: 218-233.
3. Thon G, Bjerling KP, Nielsen IS (1999) *Genetics*. **151**: 945-963.
4. Debeauchamp JL et al (2008) *Mol Cell Biol.* **28**: 2154-2166.
5. Choi ES et al (2012) *PLoS Genet.* **8**: e1002985.
6. Lejeune E et al (2007) *Curr Biol.* **17**: 1219-1224.
7. Anderson HE et al (2009) *Mol Cell Biol.* **29**: 5158-5167.
8. Blackwell C et al (2004) *Mol Cell Biol.* **24**: 4309-4320.
