# Supplementary material for: Abo1, a conserved bromodomain AAA‐ATPase, maintains global nucleosome occupancy and organisation
Source: PubMed Central journal article supplement (PMC4718406; doi:10.15252/embr.201540476), 2015-11-18
Supplement: EMBR-17-079-s006.pdf [file EMBR-17-079-s006.pdf]

Manuscript EMBO-2015-40476

**Abo1, a conserved bromodomain AAA-ATPase, maintains global nucleosome occupancy and organization**

Csenge Gal, Heather E. Murton, Lakxmi Subramanian, Alex J. Whale, Karen M. Moore, Konrad Paszkiewicz, Sandra Codlin, Jürg Bähler, Kevin M. Creamer, Janet F. Partridge, Robin C. Allshire, Nicholas A. Kent, and Simon K. Whitehall

*Corresponding author: Simon K. Whitehall, University of Newcastle*

---

|                         |                     |                   |
|-------------------------|---------------------|-------------------|
| <b>Review timeline:</b> | Submission date:    | 31 March 2015     |
|                         | Editorial Decision: | 15 May 2015       |
|                         | Revision received:  | 24 September 2015 |
|                         | Editorial Decision: | 13 October 2015   |
|                         | Revision received:  | 20 October 2015   |
|                         | Accepted:           | 26 October 2015   |

---

Editor: Esther Schnapp

No Peer Review Process File is available with this article, as the authors have chosen not to make the review process public in this case.
